# Supplementary material for: Drought Resistance and Recovery of Kentucky Bluegrass (Poa pratensis L.) Cultivars under Different Nitrogen Fertilisation Rates
Source: MDPI journal article supplement (doi:10.3390/agronomy11061128), 2021-06-01
Supplement: s1 [file s1]

**Table S1.** The effects of sampling date on green turf cover, NDVI, visual quality, and soil moisture in 2019 of the four Kentucky bluegrass cultivars ('Barduke', 'Marauder', 'Nublu Plus' and 'Brooklawn') and the tall fescue cultivar 'Rhambler SRP'.

| Parameter Cultivar   |                      | Week of the experiment |      |      |      |      |      |      |      |      |      |      |
|----------------------|----------------------|------------------------|------|------|------|------|------|------|------|------|------|------|
|                      |                      | 1                      | 2    | 3    | 4    | 5    | 6    | 7    | 8    | 9    | 10   | 11   |
| Green turf cover (%) | Barduke              | 96                     | 93   | 81   | 75   | 68   | 50   | 83   | 79   | 86   | 80   | 88   |
|                      | Marauder             | 96                     | 93   | 83   | 76   | 59   | 45   | 71   | 68   | 74   | 71   | 83   |
|                      | Nublu Plus           | 96                     | 93   | 86   | 77   | 69   | 53   | 78   | 80   | 85   | 79   | 84   |
|                      | Brooklawn            | 97                     | 95   | 85   | 80   | 71   | 58   | 84   | 80   | 84   | 79   | 85   |
|                      | Rhambler SRP         | 96                     | 93   | 90   | 85   | 81   | 77   | 82   | 83   | 86   | 85   | 90   |
|                      | LSD <sup>†</sup> = 7 |                        |      |      |      |      |      |      |      |      |      |      |
| NDVI                 | Barduke              | 0.80                   | 0.74 | 0.69 | 0.66 | 0.60 | 0.53 | 0.64 | 0.64 | 0.70 | 0.70 | 0.72 |
|                      | Marauder             | 0.84                   | 0.79 | 0.75 | 0.70 | 0.61 | 0.54 | 0.61 | 0.61 | 0.65 | 0.67 | 0.69 |
|                      | Nublu Plus           | 0.85                   | 0.80 | 0.76 | 0.71 | 0.62 | 0.55 | 0.63 | 0.66 | 0.69 | 0.71 | 0.70 |
|                      | Brooklawn            | 0.85                   | 0.80 | 0.74 | 0.69 | 0.63 | 0.56 | 0.66 | 0.63 | 0.69 | 0.70 | 0.70 |
|                      | Rhambler SRP         | 0.85                   | 0.80 | 0.79 | 0.75 | 0.71 | 0.66 | 0.70 | 0.70 | 0.74 | 0.76 | 0.76 |
|                      | LSD = 0.04           |                        |      |      |      |      |      |      |      |      |      |      |
| Visual quality (1-9) | Barduke              | 6.3                    | 6.0  | 4.7  | 4.2  | 2.8  | 2.2  | 5.3  | 5.3  | 6.7  | 6.7  | 6.7  |
|                      | Marauder             | 8.0                    | 6.5  | 5.2  | 4.5  | 3.0  | 2.3  | 4.3  | 4.5  | 5.3  | 5.8  | 6.3  |
|                      | Nublu Plus           | 7.2                    | 7.0  | 5.7  | 4.0  | 3.3  | 2.5  | 4.7  | 5.2  | 5.8  | 6.3  | 6.7  |
|                      | Brooklawn            | 6.7                    | 6.3  | 5.0  | 4.5  | 3.3  | 2.3  | 4.8  | 5.0  | 5.8  | 6.0  | 6.3  |
|                      | Rhambler SRP         | 7.5                    | 7.2  | 6.3  | 6.0  | 5.2  | 5.0  | 5.7  | 5.7  | 6.7  | 7.8  | 7.7  |
|                      | LSD = 0.8            |                        |      |      |      |      |      |      |      |      |      |      |
| Soil moisture (%)    | Barduke              | 34                     | 23   | 12   | 7    | 7    | 7    | 27   | 19   | 19   | 20   | 24   |
|                      | Marauder             | 36                     | 23   | 12   | 7    | 6    | 6    | 27   | 19   | 19   | 18   | 24   |
|                      | Nublu Plus           | 37                     | 25   | 12   | 8    | 7    | 6    | 28   | 19   | 20   | 20   | 21   |
|                      | Brooklawn            | 35                     | 23   | 11   | 7    | 7    | 7    | 26   | 19   | 18   | 18   | 21   |
|                      | Rhambler SRP         | 39                     | 30   | 18   | 15   | 14   | 13   | 30   | 28   | 27   | 26   | 29   |
|                      | LSD = 2.5            |                        |      |      |      |      |      |      |      |      |      |      |

<sup>†</sup>To determine statistical differences among entries, subtract one entry's mean from another entry's mean. Statistical differences occur when this value is larger than the corresponding LSD value (P < 0.05)

**Table S2.** The effects of sampling date on green turf cover, NDVI, visual quality, and soil moisture in 2020 of the four Kentucky bluegrass cultivars ('Barduke', 'Marauder', 'Nublu Plus' and 'Brooklawn') and the tall fescue cultivar 'Rhambler SRP'.

| Parameter Cultivar   |                      | Week of the experiment |      |      |      |      |      |      |      |      |      |      |      |      |      |
|----------------------|----------------------|------------------------|------|------|------|------|------|------|------|------|------|------|------|------|------|
|                      |                      | 1                      | 2    | 3    | 4    | 5    | 6    | 7    | 8    | 9    | 10   | 11   | 12   | 13   | 14   |
| Green turf cover (%) | Barduke              | 97                     | 95   | 91   | 81   | 74   | 65   | 58   | 55   | 68   | 70   | 75   | 76   | 73   | 73   |
|                      | Marauder             | 95                     | 93   | 87   | 77   | 65   | 61   | 54   | 48   | 60   | 62   | 66   | 69   | 67   | 70   |
|                      | Nublu Plus           | 97                     | 95   | 91   | 85   | 80   | 75   | 69   | 65   | 74   | 76   | 80   | 77   | 73   | 77   |
|                      | Brooklawn            | 98                     | 96   | 91   | 83   | 78   | 69   | 61   | 57   | 70   | 72   | 81   | 76   | 70   | 72   |
|                      | Rhambler SRP         | 96                     | 95   | 94   | 92   | 90   | 89   | 86   | 81   | 84   | 84   | 85   | 83   | 81   | 85   |
|                      | LSD <sup>†</sup> = 7 |                        |      |      |      |      |      |      |      |      |      |      |      |      |      |
| NDVI                 | Barduke              | 0.90                   | 0.85 | 0.81 | 0.75 | 0.67 | 0.62 | 0.59 | 0.51 | 0.60 | 0.62 | 0.66 | 0.66 | 0.64 | 0.64 |
|                      | Marauder             | 0.90                   | 0.85 | 0.82 | 0.73 | 0.64 | 0.58 | 0.54 | 0.47 | 0.54 | 0.57 | 0.58 | 0.64 | 0.61 | 0.61 |
|                      | Nublu Plus           | 0.91                   | 0.87 | 0.85 | 0.80 | 0.74 | 0.70 | 0.69 | 0.61 | 0.68 | 0.69 | 0.70 | 0.69 | 0.67 | 0.67 |
|                      | Brooklawn            | 0.90                   | 0.86 | 0.84 | 0.76 | 0.69 | 0.65 | 0.61 | 0.53 | 0.63 | 0.63 | 0.67 | 0.64 | 0.63 | 0.65 |
|                      | Rhambler SRP         | 0.91                   | 0.89 | 0.86 | 0.85 | 0.82 | 0.80 | 0.80 | 0.74 | 0.77 | 0.79 | 0.78 | 0.78 | 0.79 | 0.77 |
|                      | LSD = 0.05           |                        |      |      |      |      |      |      |      |      |      |      |      |      |      |
| Visual quality (1-9) | Barduke              | 7.0                    | 6.2  | 6.2  | 5.5  | 5.2  | 4.8  | 4.5  | 2.7  | 5.0  | 4.8  | 5.5  | 5.5  | 5.5  | 5.3  |
|                      | Marauder             | 8.0                    | 7.2  | 6.8  | 5.8  | 4.8  | 4.0  | 3.8  | 2.5  | 3.8  | 3.3  | 4.3  | 4.3  | 4.2  | 3.8  |
|                      | Nublu Plus           | 7.8                    | 7.2  | 7.3  | 6.8  | 6.2  | 5.8  | 5.3  | 3.5  | 5.5  | 5.5  | 6.3  | 6.3  | 5.8  | 5.8  |
|                      | Brooklawn            | 7.3                    | 6.2  | 6.2  | 5.7  | 5.5  | 5.2  | 4.8  | 3.3  | 5.5  | 5.2  | 5.7  | 5.7  | 5.3  | 5.0  |
|                      | Rhambler SRP         | 7.5                    | 7.0  | 7.2  | 7.2  | 7.2  | 7.2  | 7.0  | 6.2  | 6.3  | 6.0  | 6.7  | 7.0  | 6.7  | 7.0  |
|                      | LSD = 0.8            |                        |      |      |      |      |      |      |      |      |      |      |      |      |      |
| Soil moisture (%)    | Barduke              | 35                     | 33   | 24   | 17   | 10   | 7    | 5    | 6    | 32   | 22   | 22   | 22   | 30   | 25   |
|                      | Marauder             | 33                     | 29   | 21   | 13   | 9    | 5    | 4    | 4    | 29   | 21   | 24   | 23   | 26   | 24   |
|                      | Nublu Plus           | 36                     | 32   | 21   | 16   | 10   | 8    | 8    | 7    | 30   | 22   | 26   | 22   | 25   | 23   |
|                      | Brooklawn            | 35                     | 29   | 22   | 17   | 11   | 7    | 7    | 6    | 26   | 23   | 26   | 25   | 26   | 24   |
|                      | Rhambler SRP         | 37                     | 31   | 28   | 24   | 20   | 17   | 15   | 16   | 33   | 27   | 30   | 26   | 29   | 29   |
|                      | LSD = 2.7            |                        |      |      |      |      |      |      |      |      |      |      |      |      |      |

<sup>†</sup>To determine statistical differences among entries, subtract one entry's mean from another entry's mean. Statistical differences occur when this value is larger than the corresponding LSD value (P < 0.05)
